# Supplementary material for: Transcriptomic Analysis Provides Insights into Anthocyanin Accumulation in Mulberry Fruits
Source: MDPI journal article supplement (doi:10.3390/horticulturae8100920), 2022-10-07
Supplement: s1 [file s1]

# Transcriptomic Analysis Provides Insights into Anthocyanin Accumulation in Mulberry Fruits

Rongli Mo, Na Zhang, Jinxin Li, Qiang Jin, Zhixian Zhu, Zhaoxia Dong, Yong Li, Cheng Zhang and Cui Yu

**Table S1.** Primers used for qRT-PCR analysis in this study.

| Primer Name                            | Forward primer        | Reverse primer          |
|----------------------------------------|-----------------------|-------------------------|
| <i>CHS</i> ( <i>M.alba</i> G0019389)   | GAACACAAGACTGAACTCAA  | ATCTCCACCACCACTATG      |
| <i>CHI</i> ( <i>M.alba</i> G0003811)   | CCAGGGTGACGATGATAT    | GTGTGAAGAGAATAGAGGAAC   |
| <i>F3H</i> ( <i>M.alba</i> G0005697)   | GGCGTGAGATAGTGACATA   | ATGGCTTCTGACAATACCT     |
| <i>DFR1</i> ( <i>M.alba</i> G0013172)  | CGGGTTACATCGGATCAT    | TCCACAGTGTCAGGTTAC      |
| <i>DFR1</i> ( <i>M.alba</i> G0013173)  | AAGATGACTGGATGGATGTAT | AGCGTTGGAATAATAGTAATGAA |
| <i>ANS</i> ( <i>M.alba</i> G000542)    | GTTGGAAGCAGGAAGACTA   | GTTGTGGAGGATGAAGGT      |
| <i>MYB</i> ( <i>M.alba</i> G0017209)   | CTCTTGCTTAATGACGCTATT | CTGTCCTTCTTCAATGGTATG   |
| <i>MYB</i> ( <i>M.alba</i> G0017689)   | CAAGAACTATTGGAACACTCA | TGGAAGAAGAAGAAGAAGGTA   |
| <i>bHLH</i> ( <i>M.alba</i> G0012659)  | AAGAATCGTTGGAAGAAGAC  | AGGAGGTGAGGAAGAGTA      |
| <i>bHLH</i> ( <i>M.alba</i> G0009347)  | AGGAGGAACTATGCCAAG    | CAACAAGTCTTCACCATCTT    |
| <i>bHLH3</i> ( <i>M.alba</i> G0016257) | CGAAGAAGGTCTGGTAGG    | CTTGATTGCTCCGTTGTAAT    |
| <i>ERF</i> ( <i>M.alba</i> G0016603)   | TCTACACAGAACACCAGAT   | CAAGCCAGAACCAGATAAG     |
| MaActin                                | GCATGAAGATCAAGGTGGTG  | CATCTGCTGGAAGGTGCTAA    |

**Table S2.** Statistics of the RNA-seq profiles between both genotypes (ZJ and ZZB) at seven different developmental stages.

| Sample   | Total_reads n | Clean_reads n | Mapped_to_gene n | Mapped_to_gene % | Q20 (%) | Q30 (%) |
|----------|---------------|---------------|------------------|------------------|---------|---------|
| ZJ-5-1   | 43991576      | 41002582      | 33802336         | 91.80            | 97.26   | 92.9    |
| ZJ-5-2   | 41792118      | 38809038      | 31459187         | 91.01            | 97.12   | 92.67   |
| ZJ-5-3   | 46084942      | 42564530      | 34715759         | 91.25            | 97.25   | 92.82   |
| ZJ-18-1  | 45993830      | 42347176      | 34044727         | 90.32            | 97.08   | 92.53   |
| ZJ-18-2  | 45600538      | 42459894      | 34602315         | 90.53            | 97.22   | 92.75   |
| ZJ-18-3  | 44165960      | 41200468      | 32657926         | 89.59            | 97.17   | 92.8    |
| ZJ-27-1  | 42219028      | 39312200      | 31536540         | 89.64            | 97.13   | 92.72   |
| ZJ-27-2  | 44075988      | 41009902      | 33005741         | 90.30            | 97.1    | 92.56   |
| ZJ-27-3  | 42602126      | 39769794      | 32128296         | 90.08            | 97.36   | 93.18   |
| ZJ-31-1  | 40023860      | 37349058      | 30322721         | 90.44            | 97.18   | 92.75   |
| ZJ-31-2  | 54806772      | 51388246      | 41731204         | 89.95            | 97.44   | 92.89   |
| ZJ-31-3  | 41765098      | 39065318      | 31235653         | 89.61            | 97.08   | 92.6    |
| ZZB-5-1  | 47731058      | 44622472      | 36350227         | 90.51            | 97.02   | 92.44   |
| ZZB-5-2  | 40313714      | 37655818      | 30604133         | 90.56            | 97.23   | 92.94   |
| ZZB-5-3  | 43522990      | 40456252      | 32623804         | 90.23            | 96.96   | 92.3    |
| ZZB-18-1 | 39678182      | 37084754      | 30600321         | 91.36            | 97.09   | 92.56   |
| ZZB-18-2 | 42460294      | 39617712      | 30381312         | 89.27            | 97.25   | 93.04   |
| ZZB-18-3 | 46886042      | 43192936      | 35108175         | 90.65            | 96.43   | 90.67   |
| ZZB-27-1 | 46514916      | 43305982      | 35472716         | 91.35            | 97.19   | 92.84   |
| ZZB-27-2 | 43838368      | 40889362      | 32511324         | 90.80            | 97.14   | 92.82   |
| ZZB-27-3 | 42924204      | 39848078      | 32421503         | 90.94            | 97.29   | 92.91   |
| ZZB-31-1 | 43019936      | 40186340      | 32880140         | 91.06            | 96.93   | 92.34   |
| ZZB-31-2 | 39722996      | 36986238      | 30251808         | 91.09            | 97.16   | 92.75   |
| ZZB-31-3 | 40604888      | 37808568      | 31025938         | 90.92            | 97.35   | 93.05   |

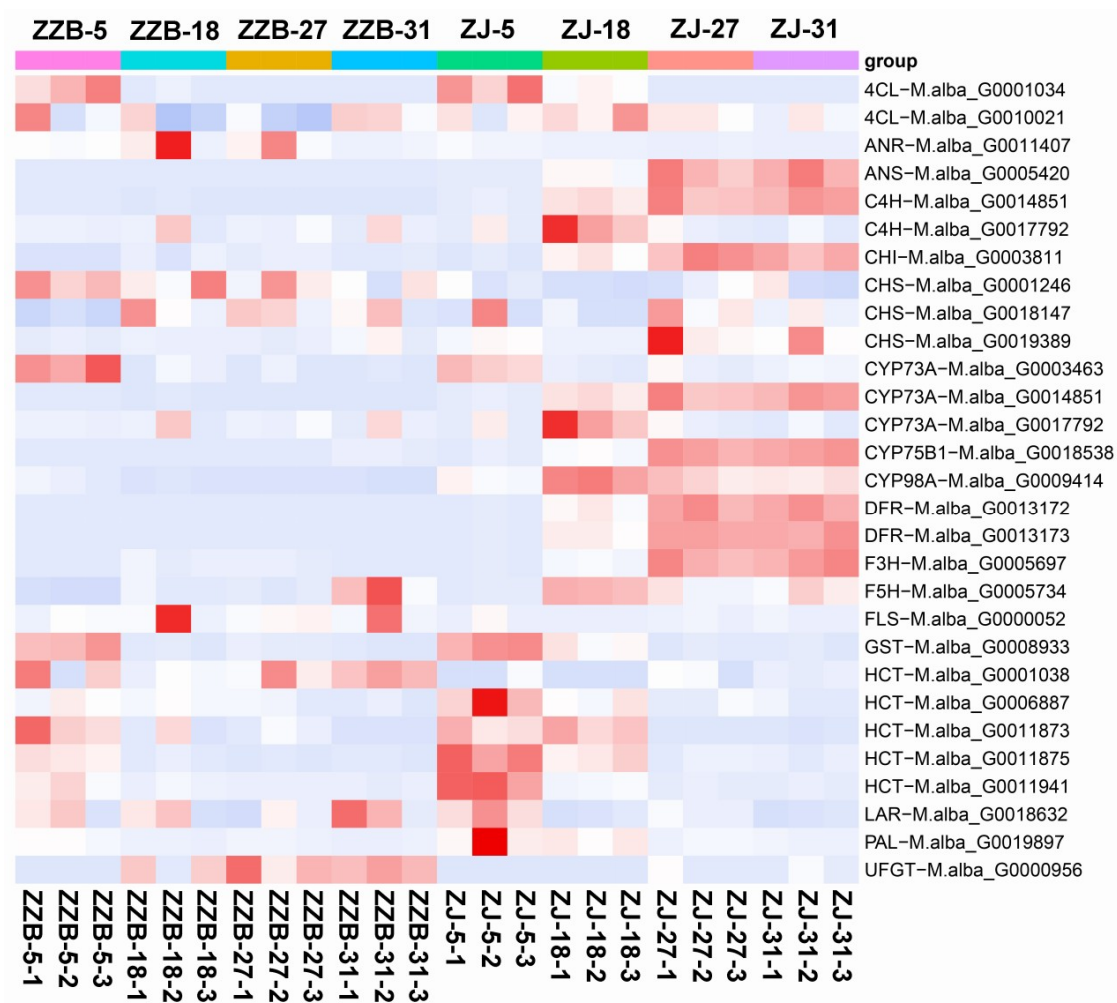

**Figure S1.** Heatmap for DEG structural genes involved in flavonoid–anthocyanin biosynthesis between ZZB and ZJ at different development stages.

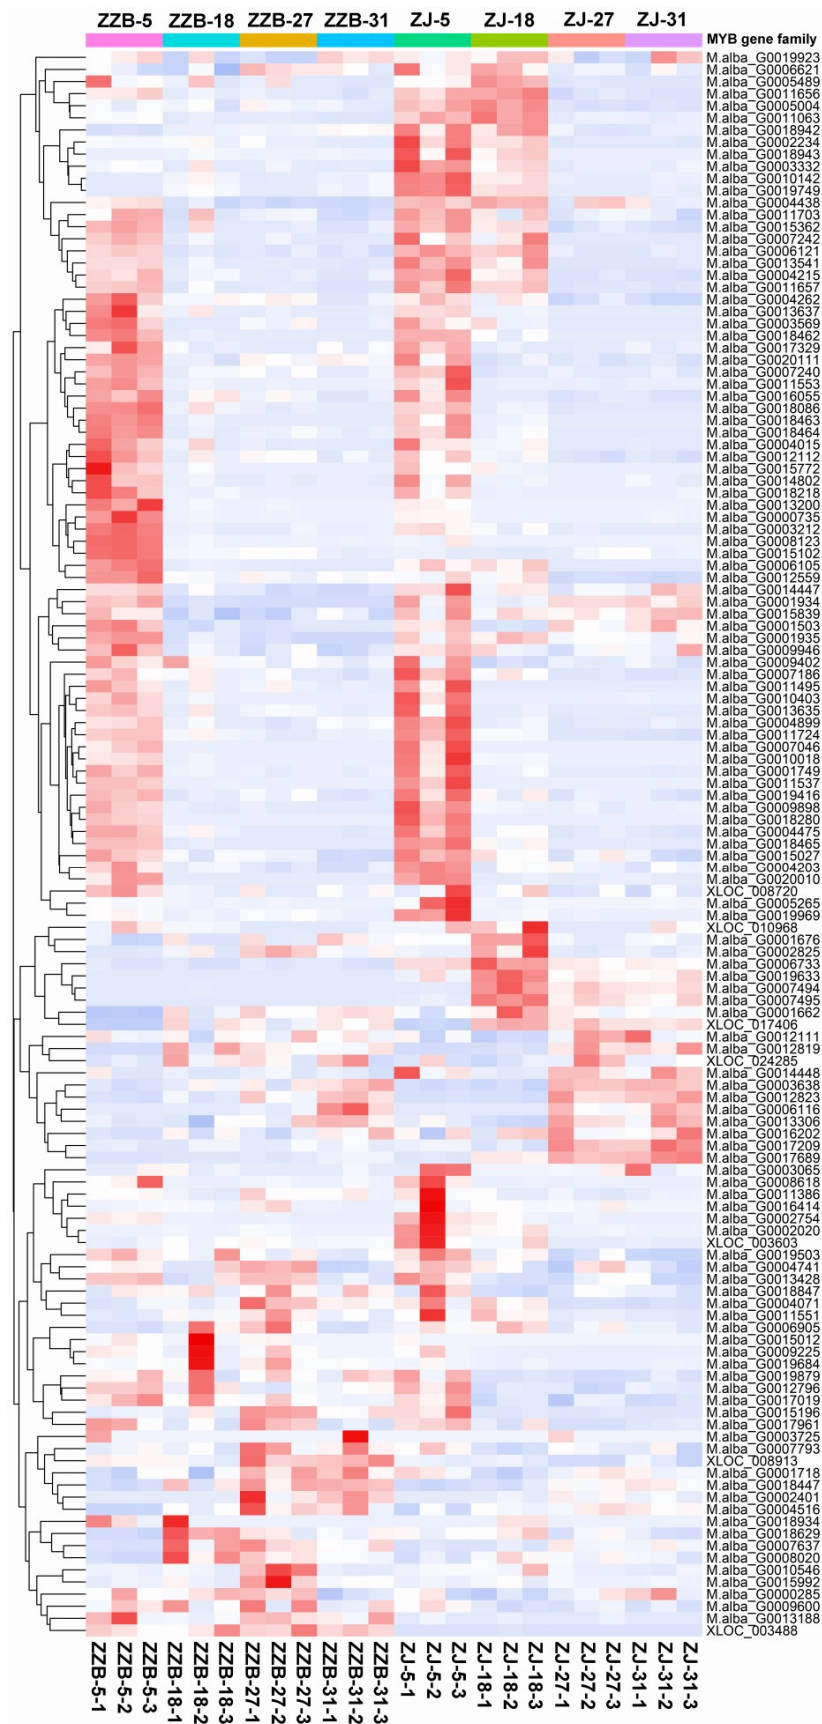

**Figure S2.** Heatmap for the DEGs of the MYB gene family between ZZB and ZJ at different development stages

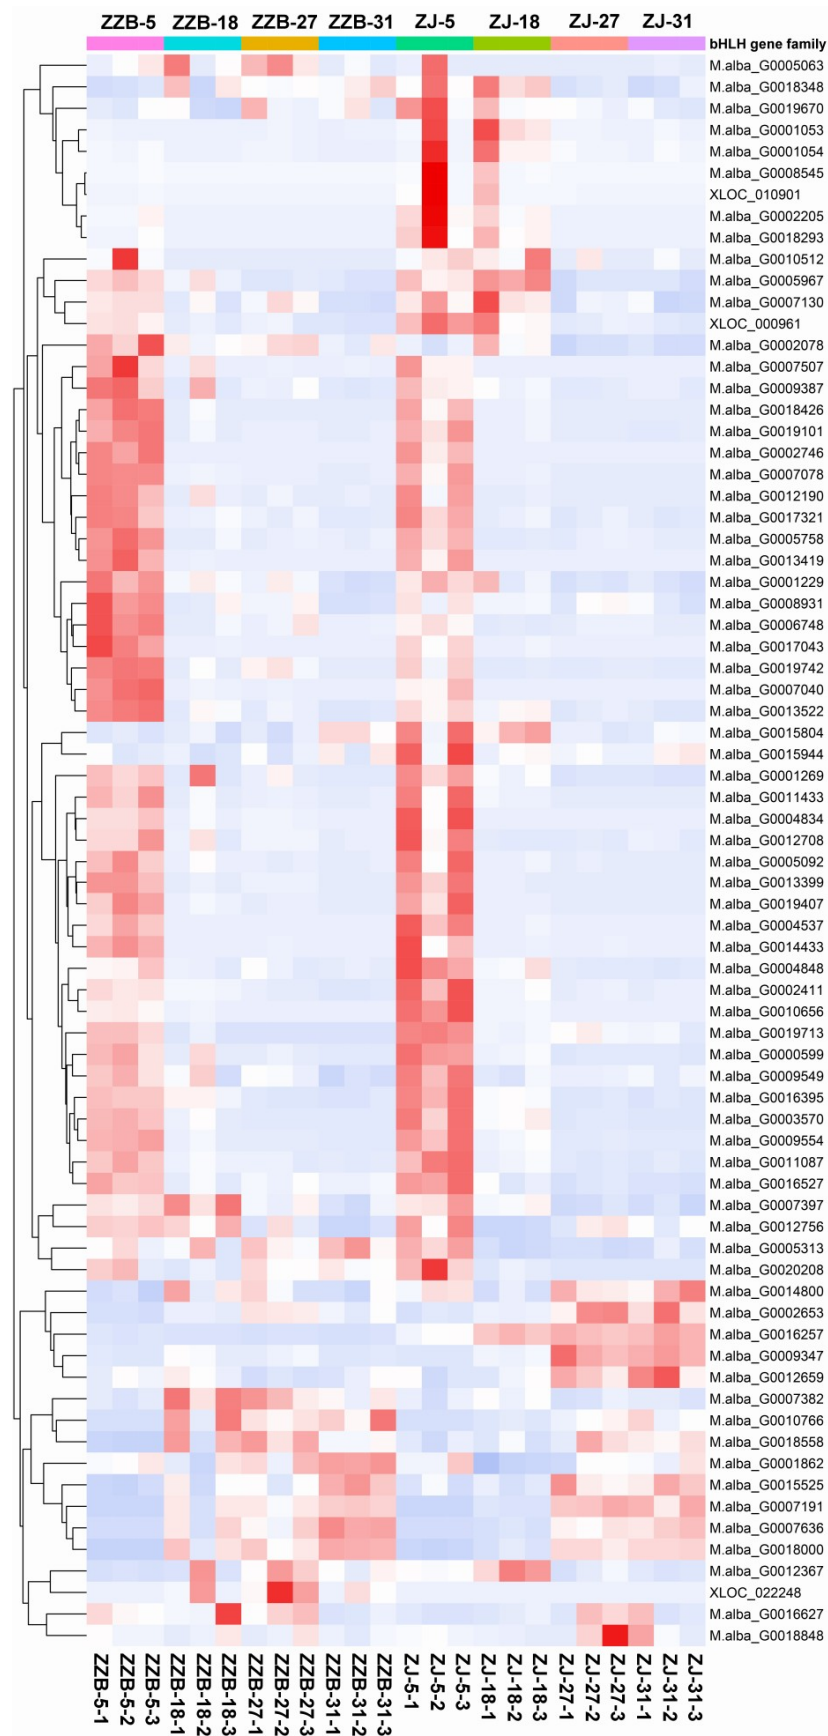

**Figure S3.** Heatmap for the DEGs of the *bHLH* gene family between ZZB and ZJ at different development stages

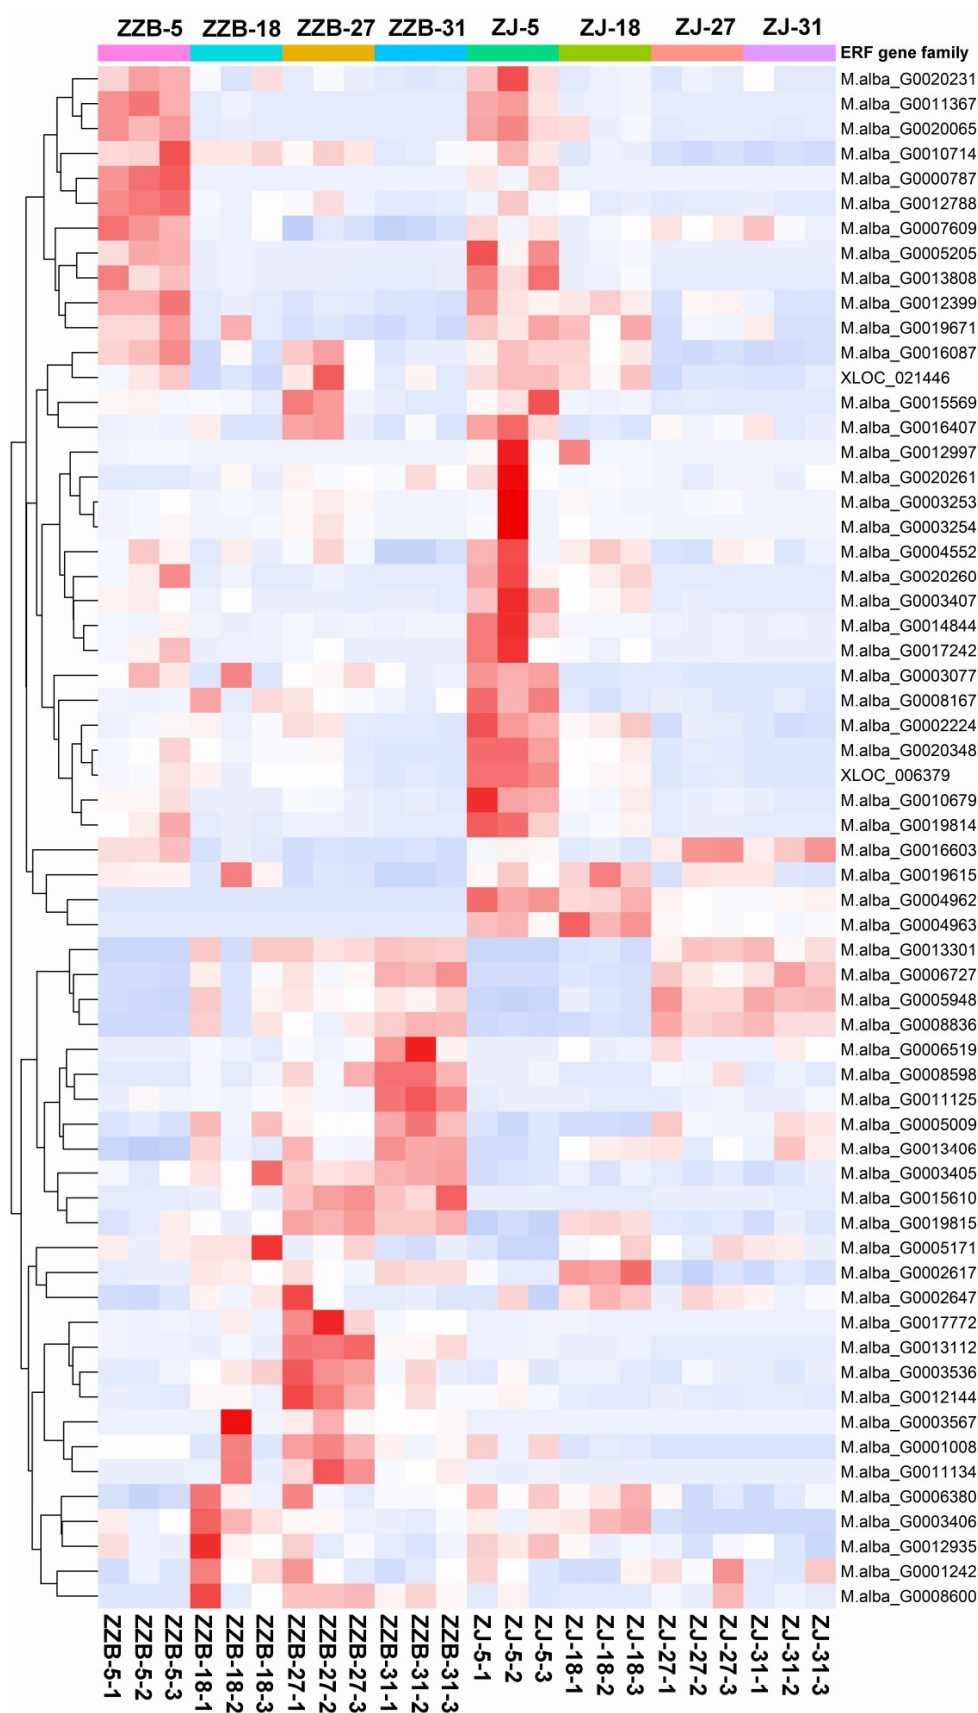

**Figure S4.** Heatmap for the DEGs of *ERF* gene family between ZZB and ZJ at different development stages



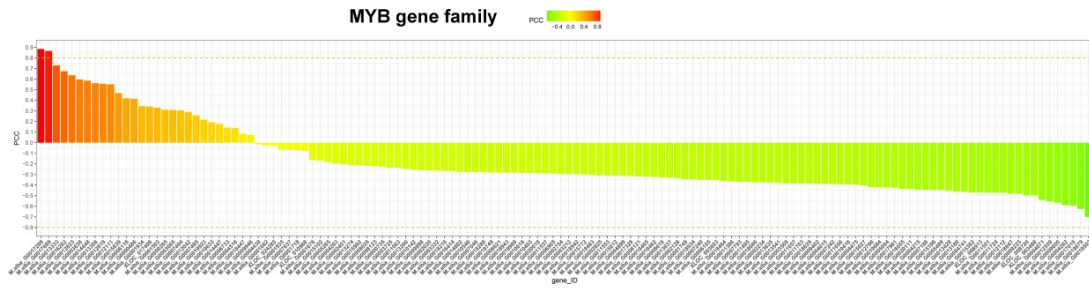

**Figure S5.** Pearson correlation coefficient, PCC ( $r$ ) between the anthocyanin content and the expressions of the MYB gene family in ZJ and ZZB at different development stages.

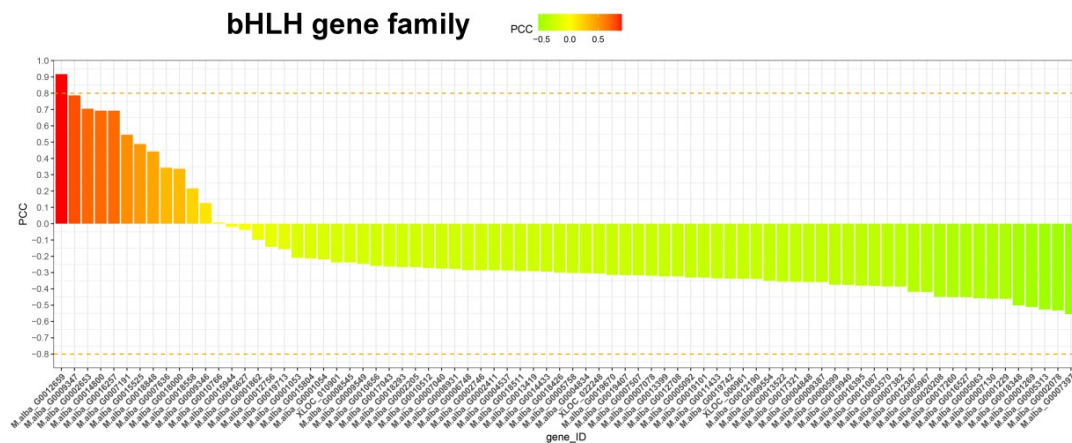

**Figure S6.** Pearson correlation coefficient, PCC ( $r$ ) between the anthocyanin content and the expressions of the bHLH gene family in ZJ and ZZB at different development stages

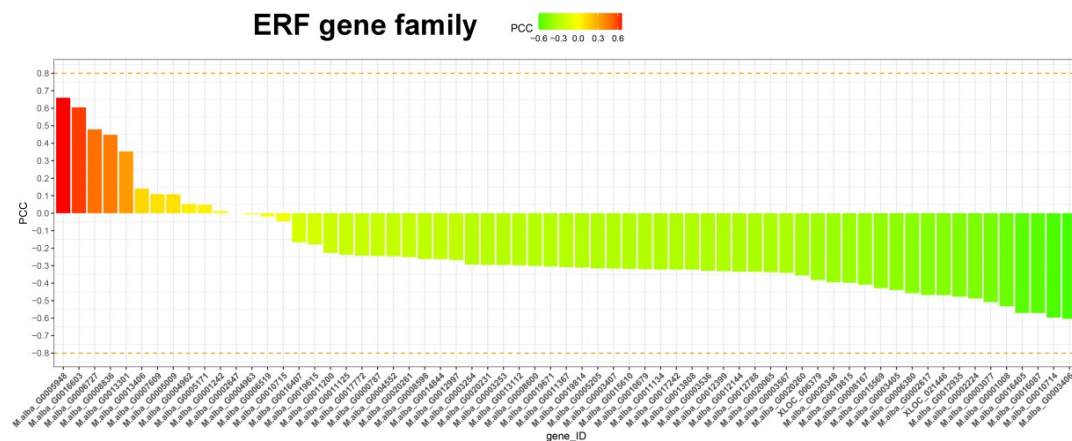

**Figure S7.** Pearson correlation coefficient, PCC ( $r$ ) between the anthocyanin content and the expressions of the ERF gene family in ZJ and ZZB at different development stages.
